# Supplementary material
Source: publisher figshare collection journal article supplement (https://tandf.figshare.com/articles/dataset/_/7076879)
Supplement: Supplementary file 1 [file tres_a_1466081_sm9113.docx]

# Appendix 1

MODTRAN is a well-established atmospheric radiance transfer code reported to outperform other radiation transfer codes (Staenz et al. 2002) and on which the major atmospheric correction commercial software is based on (e.g. FLAASH and ATCOR-4). Another atmospheric correction method considered in this study was the QUick Atmospheric Correction (QUAC) which is a more automated and approximate method than FLAASH in the sense that the algorithm does not feed on information from the user about the illumination conditions, but rather derives it from within the scene. QUAC also does not account for the adjacency effect neither scene average visibility and requires several materials to be encountered in the scene, including a dark pixel. QUAC yielded similar results while underestimating the overall reflectance magnitude.
